# Supplementary material for: p130Cas Is Correlated with EREG Expression and a Prognostic Factor Depending on Colorectal Cancer Stage and Localization Reducing FOLFIRI Efficacy
Source: MDPI journal article supplement (doi:10.3390/ijms222212364), 2021-11-16
Supplement: s1 [file s1]

# **Supplementary Figures and Material and Methods**

## **p130Cas Is Correlated with EREG Expression and a Prognostic Factor Depending on Colorectal Cancer Stage and Localization Reducing FOLFIRI Efficacy**

**Jörg Kumbrink<sup>1,2,\*</sup>, Pan Li <sup>1</sup>, Agnes Pók-Udvari <sup>1</sup>, Frederick Klauschen <sup>1,2</sup>, Thomas Kirchner <sup>1,2</sup> and Andreas Jung <sup>1,2</sup>**

<sup>1</sup> Faculty of Medicine, Institute of Pathology, Ludwig-Maximilians-University Munich, 80337 Munich, Germany.

<sup>2</sup> German Cancer Consortium (DKTK), partner site Munich, 803367 Munich, Germany.

\* Correspondence: Joerg.Kumbrink@med.uni-muenchen.de

**Figure S1**

**Figure S2**

**Figure S3**

**Figure S4**

**Table S1**

**Table S2**

**Table S3**

**Table S4**

**Supplementary Material and Methods**

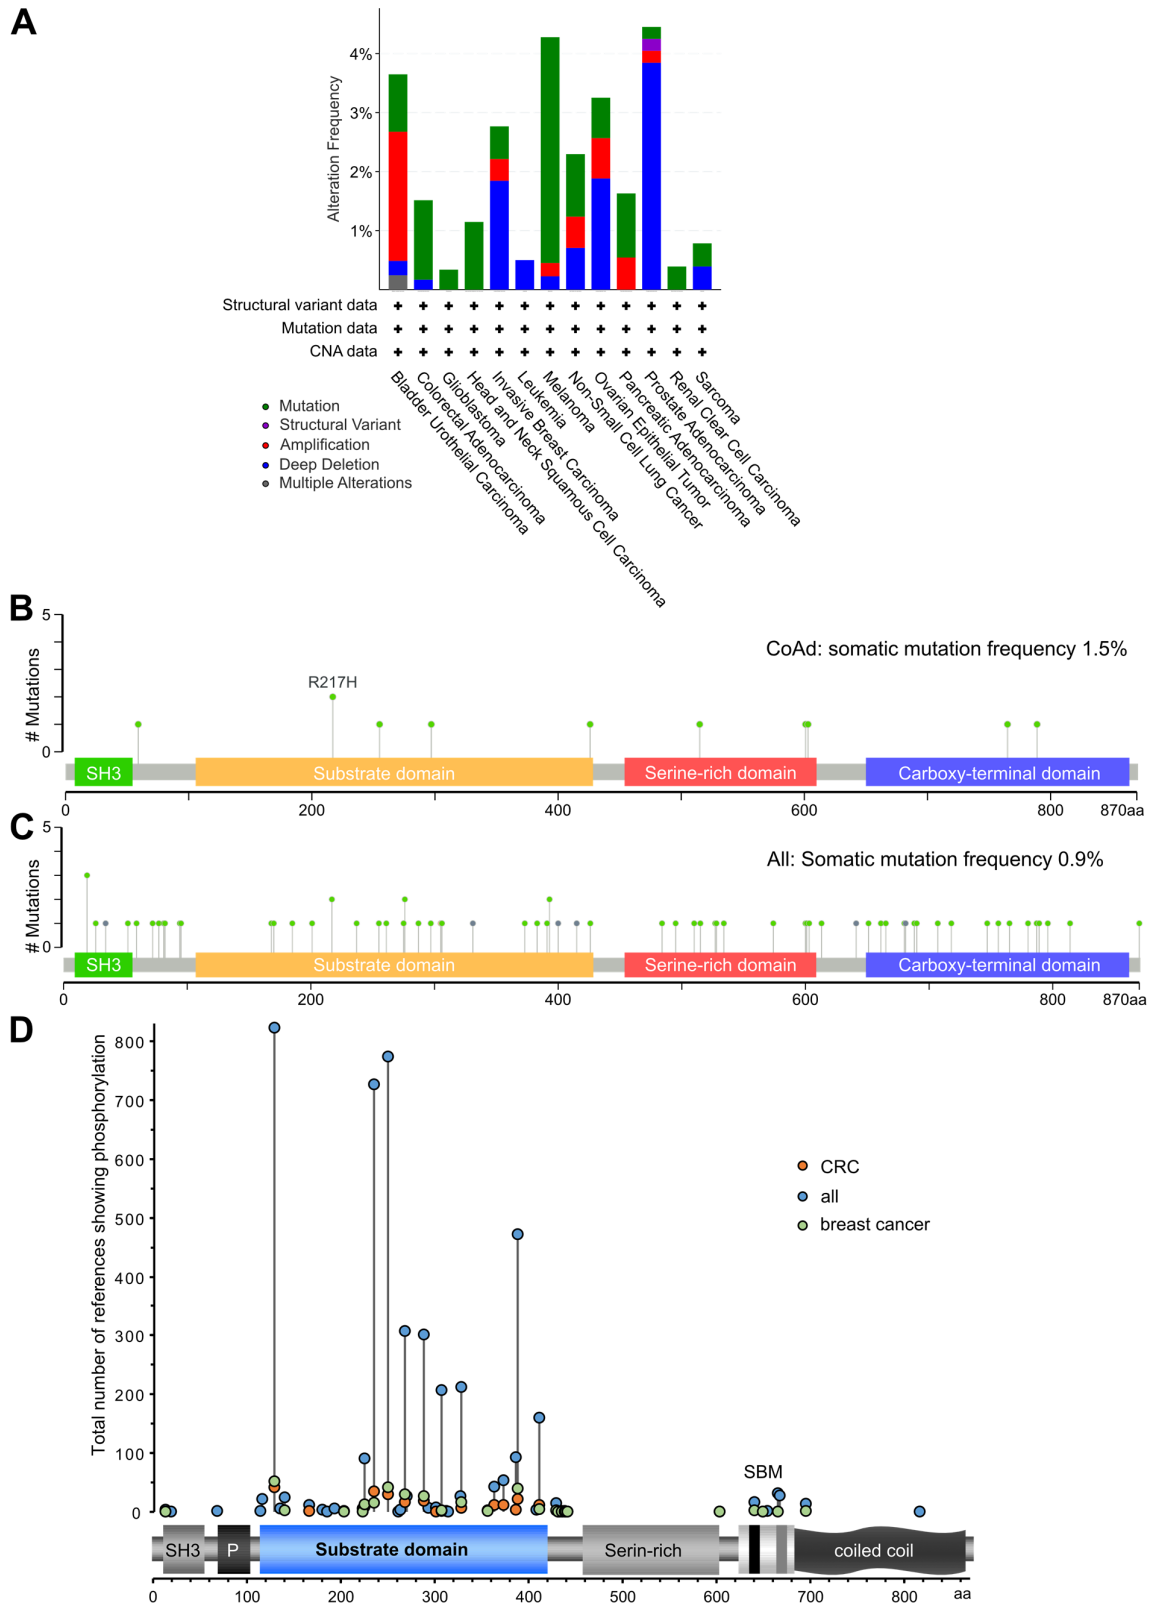

**Figure S1. *BCAR1*/p130Cas is not commonly mutated but phosphorylated in human colorectal adenocarcinomas.**

A. *BCAR1* alteration frequencies in the indicated TCGA PanCancer Atlas datasets. B-C. Number of reported mutations at the cBioportal in different p130Cas domains in all TCGA datasets indicated in A (B) and colorectal adenocarcinomas (C). D. Number of studies showing phosphorylation of certain motifs in the different p130Cas domains as curated at PhosphositePlus. P, proline-rich domain. SBM, bipartite Src binding motif.

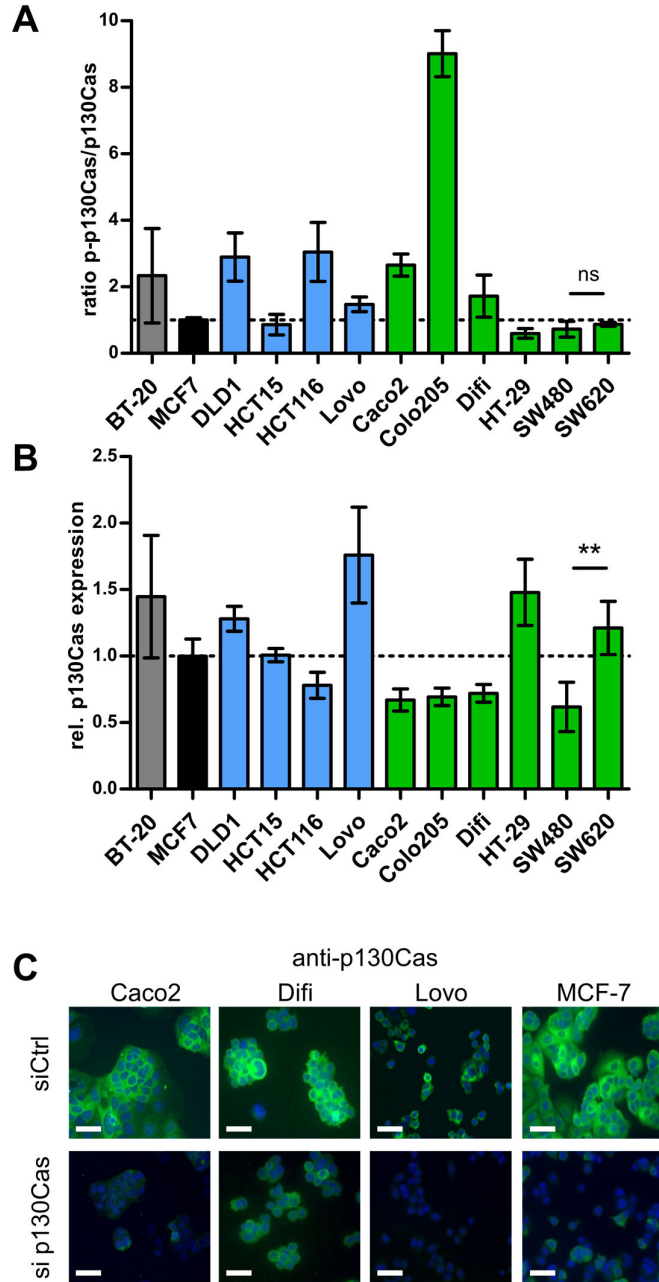

**Figure S2. p130Cas expression and phosphorylation in a panel of CRC and breast cancer cell lines.** **A.** Ratio of active p-p130Cas to p130Cas in relation to MCF7 (set to 1). **B.** Ratio of p130Cas to Actin in relation to MCF7 (set to 1). **C.** Cells were transfected with siRNA targeting p130Cas or control siRNA and at 48 h p130Cas expression was analyzed by immunofluorescence staining. Scale bars, 100  $\mu$ m.

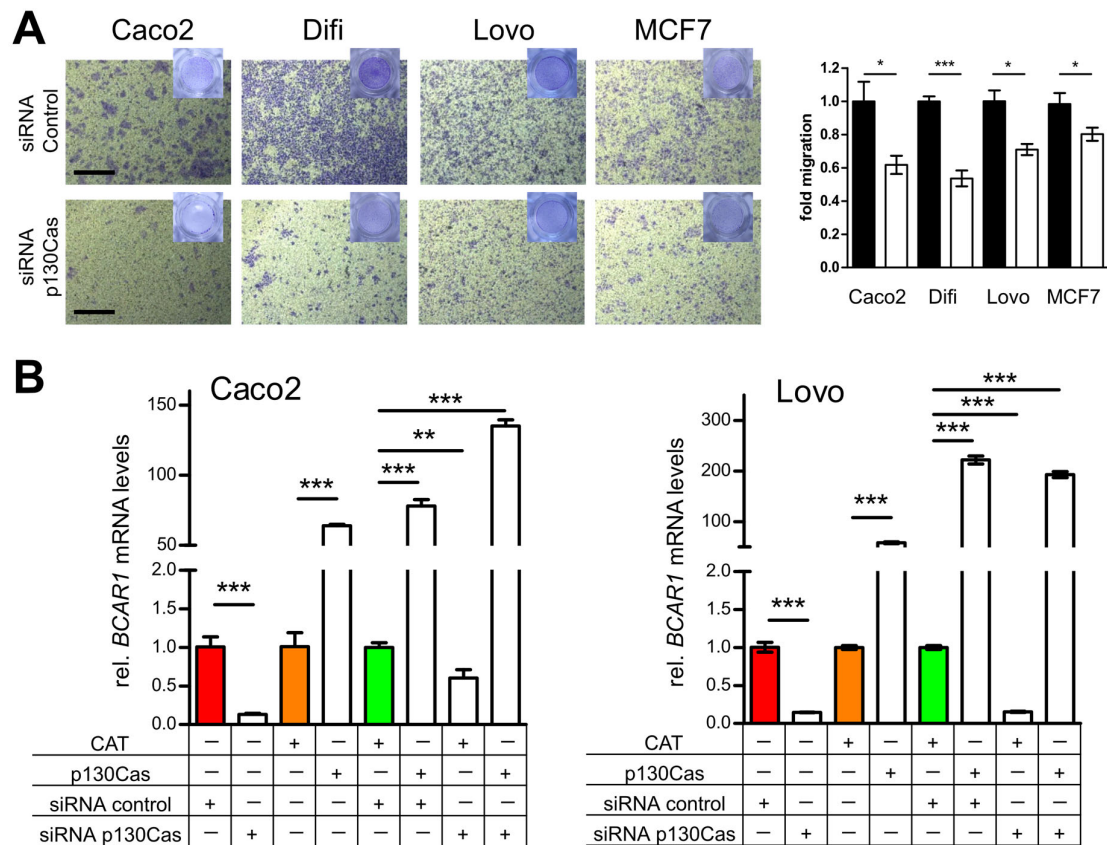

**Figure S3. p130Cas drives migration in CRC cell lines.** A. Cells transiently transfected with siRNA control or siRNA directed against p130Cas were subjected to serum-stimulated migration assay as described. Left panels, shown are representative images from at least two independent experiments. scale bars, 500  $\mu$ m. Right panel, shown are fold migration (siRNA control was set to 1) and SEM of triplicates from at least two independent experiments. B. *BCAR1* mRNA expression levels in Caco2 and Lovo cells used for the rescue migration experiments in Figure 2E after transfection with the indicated plasmids or siRNAs. \*,  $p < 0.05$ ; \*\*,  $p < 0.01$ ; \*\*\*,  $p < 0.001$ .

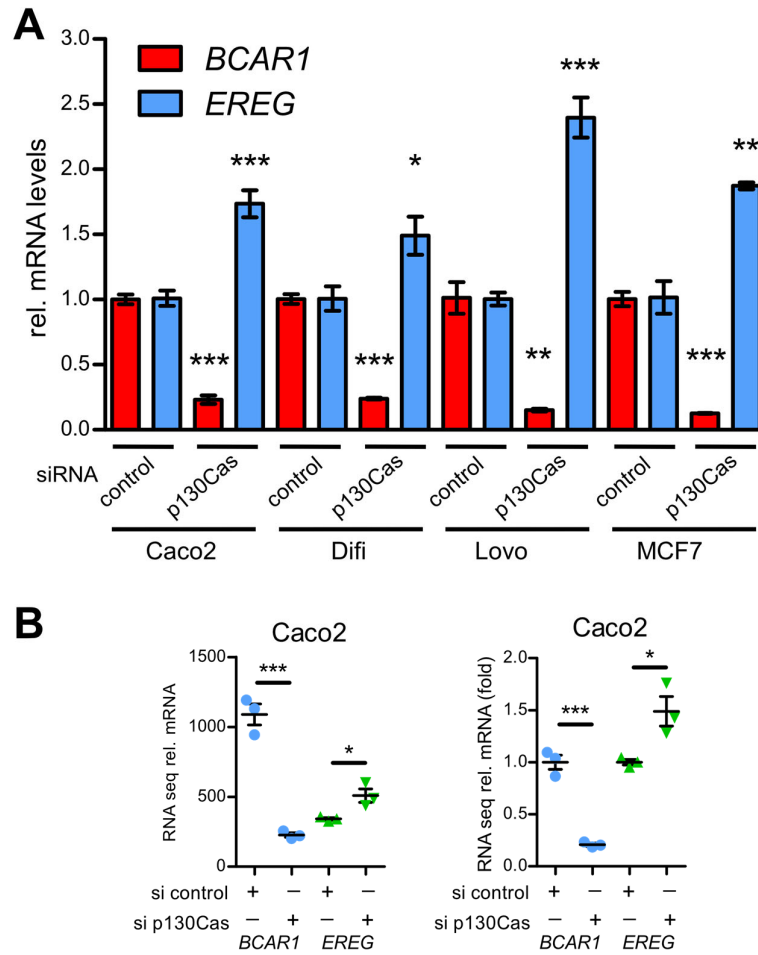

**Figure S4. p130Cas/BCAR1 knockdown induces EREG expression. A-B.** Cells were transfected with siRNA targeting *BCAR1* or control siRNA and harvested at 48 h. *BCAR1* and *EREG* levels after p130Cas knockdown were quantified by RT qPCR (**A**) or RNA sequencing (**B**). **A.** Shown are expression levels in relation to control siRNA (set to 1) from one representative out of three performed experiments. **B.** Presented are normalized expression values (DESeq2, left panel) or expression in relation to control siRNA (set to 1, right panel) from three biological replicates. \*,  $p < 0.05$ . \*\*,  $p < 0.01$ . \*\*\*,  $p < 0.001$ . si, short interfering RNA.

**Table S1. Primer sequences**

| Gene                           | Forward (5'–3')                         | Reverse (5'–3')                               | Purpose                  | UPL-# |
|--------------------------------|-----------------------------------------|-----------------------------------------------|--------------------------|-------|
| <i>CAT</i><br>( <i>Bam</i> HI) | CTAGACTGCCGGATCCATGGA<br>GAAAAAATCACTGG | GCTTAATTAAGGATCCCTTACG<br>CCCCGCCCTGCCACTCATC | Subcloning into pCXbsr   | –     |
| <i>BCAR1</i>                   | ACAGGGGAAGGAGGAGTTTG                    | GTGATGCTGCCCTTTTCC                            | mRNA expression          | 17    |
| <i>EREG</i>                    | TGGTCTCTTCACTCAGGTCTCA                  | CGTGAGTTGGCATAGGGAAC                          | mRNA expression          | 86    |
| <i>GAPDH</i>                   | AGCCACATCGCTCAGACAC                     | GCCCAATACGACCAAATCC                           | Expression normalization | 60    |

**Table S2. MSI and mutation status of used cell lines.** In grey, cell lines were derived from the same patient.

| cell line | tumor                     | status          | RAS | BRAF | PIK3CA | CTNNB1 | APC  | TP53 |
|-----------|---------------------------|-----------------|-----|------|--------|--------|------|------|
| DLD1      | colon                     | MSI             | mut | WT   | mut    | WT     | mut  | mut  |
| HCT15     | colon                     | MSI             | mut | WT   | mut    | WT     | mut  | mut  |
| HCT116    | colon                     | MSI             | mut | WT   | mut    | mut    | WT   | WT   |
| Lovo      | colon, distant lymph node | MSI             | mut | WT   | WT     | WT     | mut  | WT   |
| Caco2     | colon                     | MSS             | WT  | WT   | WT     | mut    | mut  | mut  |
| Colo205   | caecum                    | MSS             | WT  | mut  | WT     | mut    | mut  | mut  |
| Difi      | rectum                    | MSS             | WT  | WT   | WT     | WT     | mut  | mut  |
| HT29      | colon                     | MSS             | WT  | mut  | WT     | WT     | mut  | mut  |
| SW480     | colon                     | MSS             | mut | WT   | WT     | WT     | mut  | mut  |
| SW620     | lymph node metastasis     | MSS             | mut | WT   | WT     | WT     | mut  | mut  |
| MCF7      | breast                    | ER/PR+/MSSS     | WT  | WT   | mut    | (WT)   | (WT) | WT   |
| BT-20     | breast                    | Triple-neg./MSS | WT  | WT   | mut    | (WT)   | (WT) | mut  |

**Table S3. Spearman correlation of *BCAR1* and *EREG* expression in the TCGA CoAd (A) and GSE131418 (B) datasets.** AJCC, American Joint Committee on Cancer.

**A.**

| correlation<br><i>BCAR1</i> and <i>EREG</i> | stage<br>(AJCC) | <i>n</i> | Spearman's            |                |
|---------------------------------------------|-----------------|----------|-----------------------|----------------|
|                                             |                 |          | Coefficient ( $r_s$ ) | <i>p</i> value |
| all                                         | I               | 103      | <b>-0.3355</b>        | <b>0.0005</b>  |
|                                             | II              | 218      | -0.2045               | <b>0.0024</b>  |
|                                             | III             | 168      | <b>-0.2951</b>        | <b>0.0001</b>  |
|                                             | IV              | 85       | -0.06721              | 0.5411         |
| left sided<br>(incl. Rectum)                | I               | 47       | -0.1852               | 0.2125         |
|                                             | II              | 87       | -0.005577             | 0.9591         |
|                                             | III             | 91       | <b>-0.3041</b>        | <b>0.0034</b>  |
|                                             | IV              | 46       | -0.01573              | 0.9174         |
| Left-sided (-rectum)                        | I               | 32       | -0.1012               | 0.5817         |
|                                             | II              | 57       | -0.05218              | 0.6999         |
|                                             | III             | 70       | <b>-0.2743</b>        | <b>0.0216</b>  |
|                                             | IV              | 33       | -0.07854              | 0.6639         |
| Right-sided                                 | I               | 34       | <b>-0.5603</b>        | <b>0.0006</b>  |
|                                             | II              | 79       | <b>-0.3041</b>        | <b>0.0064</b>  |
|                                             | III             | 49       | -0.1383               | 0.3434         |
|                                             | IV              | 22       | -0.2874               | 0.1947         |
| C. sigmoideum                               | I               | 17       | -0.1593               | 0.5414         |
|                                             | II              | 32       | <b>-0.3178</b>        | <b>0.0763</b>  |
|                                             | III             | 36       | <b>-0.5042</b>        | <b>0.0017</b>  |
|                                             | IV              | 24       | 0.09913               | 0.6449         |
| rectum                                      | I               | 15       | -0.175                | 0.5327         |
|                                             | II              | 30       | 0.1017                | 0.5929         |
|                                             | III             | 21       | <b>-0.3519</b>        | 0.1177         |
|                                             | IV              | 14       | 0.1473                | 0.6154         |
| cecum                                       | I               | 18       | <b>-0.3519</b>        | 0.1521         |
|                                             | II              | 27       | <b>-0.6093</b>        | <b>0.0007</b>  |
|                                             | III             | 21       | -0.213                | 0.3539         |
|                                             | IV              | 13       | -0.05495              | 0.8585         |
| C. ascendens                                | I               | 15       | <b>-0.5893</b>        | <b>0.0208</b>  |
|                                             | II              | 45       | -0.1393               | 0.3616         |
|                                             | III             | 26       | -0.08103              | 0.694          |
|                                             | IV              | 10       | <b>-0.4545</b>        | 0.1912         |

|                |
|----------------|
| <i>p</i> value |
| < 0.05         |

|                       |
|-----------------------|
| Coefficient ( $r_s$ ) |
| < -0.25               |
| < -0.45               |

Table S3

B.

| correlation<br><i>BCAR1</i> and <i>EREG</i> | treatment    | <i>n</i> | Spearman's                           |                |
|---------------------------------------------|--------------|----------|--------------------------------------|----------------|
|                                             |              |          | Coefficient ( <i>r<sub>s</sub></i> ) | <i>p</i> value |
| primary                                     | pre and post | 333      | 0.0038                               | 0.95           |
|                                             | pre          | 235      | −0.007                               | 0.92           |
|                                             | post         | 98       | 0.061                                | 0.55           |
| metastasis                                  | pre and post | 184      | 0.29                                 | <0.0001        |
|                                             | pre          | 56       | 0.094                                | 0.49           |
|                                             | post         | 128      | 0.394                                | <0.0001        |
| pulmonal metastasis                         | pre and post | 43       | 0.383                                | 0.011          |
|                                             | pre          | 12       | −0.37                                | 0.24           |
|                                             | post         | 31       | 0.563                                | 0.0001         |
| hepatic metastasis                          | pre and post | 141      | 0.28                                 | 0.0008         |
|                                             | pre          | 44       | 0.241                                | 0.1144         |
|                                             | post         | 97       | 0.35                                 | 0.0005         |

|                |
|----------------|
| <i>p</i> value |
| < 0.05         |

|                                      |
|--------------------------------------|
| Coefficient ( <i>r<sub>s</sub></i> ) |
| < −0.25                              |
| > 0.25                               |
| ≥ 0.35                               |
| > 0.5                                |



**Table S4. Statistical comparison of the growth curves after the indicated treatment.**

| <b>Caco2</b>              | control<br>siRNA | control<br>siRNA<br>+EREG | p130Cas<br>siRNA | p130Cas<br>siRNA<br>+EREG |
|---------------------------|------------------|---------------------------|------------------|---------------------------|
| control<br>siRNA          | x                | 0.5632                    | 0.0012           | <0.00001                  |
| control<br>siRNA<br>+EREG | 0.5632           | x                         | 0.0028           | <0.00001                  |
| p130Cas<br>siRNA          | 0.0012           | 0.0028                    | x                | 0.00080                   |
| <b>Difi</b>               | control<br>siRNA | control<br>siRNA<br>+EREG | p130Cas<br>siRNA | p130Cas<br>siRNA<br>+EREG |
| control<br>siRNA          | x                | 0.605                     | 0.0006           | 0.001                     |
| control<br>siRNA<br>+EREG | 0.605            | x                         | 0.001            | 0.0015                    |
| p130Cas<br>siRNA          | 0.0006           | 0.001                     | x                | 0.7905                    |
| <b>Lovo</b>               | control<br>siRNA | control<br>siRNA<br>+EREG | p130Cas<br>siRNA | p130Cas<br>siRNA<br>+EREG |
| control<br>siRNA          | x                | 0.269                     | <0.0001          | 0.0005                    |
| control<br>siRNA<br>+EREG | 0.269            | x                         | 0.0005           | 0.0105                    |
| p130Cas<br>siRNA          | <0.0001          | 0.0005                    | x                | 0.05500                   |
| <b>MCF7</b>               | control<br>siRNA | control<br>siRNA<br>+EREG | p130Cas<br>siRNA | p130Cas<br>siRNA<br>+EREG |
| control<br>siRNA          | x                | 0.0214                    | <0.00001         | <0.00001                  |
| control<br>siRNA<br>+EREG | 0.0214           | x                         | 0.1262           | <0.00001                  |
| p130Cas<br>siRNA          | <0.00001         | 0.1262                    | x                | 0.00270                   |

Adjusted *p* values were calculated using the CGGC permutation test for the test statistic mean *T* from three (Caco2, Difi, MCF7) and two (Lovo) independent experiments set up in quadruplicates. Red, not significant. Yellow, *p* < 0.1. Green, *p* < 0.02.

## Supplementary Material and Methods

### *Immunofluorescence analysis*

Transiently siRNA transfected cells were cultured in 8-well chamber slides. After fixation with 3% paraformaldehyde for 10 min, cells were immunostained with p130Cas antibody (clone 21, BD Transduction Laboratories, Franklin Lakes, NJ, USA) or IgG isotype control (Thermofisher, Waltham, MA, USA, #31903) followed by Alexa Fluor 488 Goat Anti-Mouse IgG (Molecular Probes, Eugene, OR, USA). Nuclei were labeled with 4',6-diamidino-2-phenylindole (DAPI, Thermofisher, Waltham, MA, USA). Imaging of stained chamber slides was performed with an Olympus BX53 fluorescence microscope (Olympus, Tokyo, Japan) equipped with a CCD camera.

### *RNA sequencing, data processing and analyses*

Cells were transfected with siRNAs targeting *BCAR1*/p130Cas or with control siRNAs as described in the main manuscript for 48 h. Three independent experiments were conducted. RNA was extracted using the RNeasy kit (Qiagen, Hilden, Germany). RNA integrity and quality was validated on an Agilent 2100 Bioanalyzer Instrument (Agilent, Santa Clara, CA, USA).

Poly(A) RNA sequencing was performed using an adapted version of the previously described protocol, which also contains the sequences of the used primers [1]. Briefly, 25 ng of fragmented total RNA was reverse transcribed with Maxima H Minus reverse transcriptase (Thermofisher, Waltham, MA, USA) using oligo(dT) primers containing barcode and unique molecular identifier (UMI) sequences (E3V6NEXT primers) as well as the universal adapter primer (E5V6NEXT). cDNA was purified with DNA Clean & Concentrator-5 columns (Zymo Research, Irvine, CA, USA), treated with Exonuclease I (New England Biolabs, Ipswich, MA, USA) and subsequently amplified (12 PCR cycles) using KAPA HiFi Hot Start polymerase (Roche, Basel, Switzerland) and SINGV6 primer. The PCR products were purified using AMPure beads (Beckman Coulter, Brea, CA, USA) and the purified DNA was quantified utilizing the Qubit dsDNA HS Assay Kit (Thermofisher, Waltham, MA, USA). Subsequently, the Nextera XT DNA library preparation kit (Illumina, San Diego, CA, USA) was used for rapid library preparation according to the manufacturer's instructions, with the exception that the i5 primer was replaced by the P5NEXTPT5 primer. The quality of the library was checked by Qubit quantification and with an Agilent 2100 bioanalyzer using Agilent High sensitivity DNA chips (Agilent, Santa Clara, CA, USA). The library was denatured and diluted to 20 pM. Sequencing was performed on an Illumina NextSeq 500 using the NextSeq 500/550 high output v2 kit (Illumina, San Diego, CA, USA) for dual-indexed sequencing according to the manufacturer's instructions.

Sequencing raw data were processed as follows. Demultiplexing and conversion: bcl2fastq2. Quality control: FastQC/MultiQC (Galaxy module). FastQ to BAM (Alignment): RNASTar. Counting/Annotation: HTSeq-count/hg19 GTF/GFF File. Normalization of expression data and subsequent identification of expression changes and differentially expressed genes (DEGs) were performed with the R package DESeq2 (1.26) [2]. Adjusted *p* values/false discovery rates (FDR) were calculated using Benjamini and Hochberg correction [3]. Heat maps with hierarchical clustering of the top 50 significantly differentially expressed genes with a log<sub>2</sub>fold change ≥1/-1 were generated involving Pearson's correlation, applying the R package pheatmap (1.0.12). Volcano plots were drawn with the EnhancedVolcano package (1.4.0) in R. Gene Set Enrichment Analysis (GSEA) were performed using the Hallmark and C2 KEGG data sets (Broad Institute, Cambridge, MA, USA) [4].

## References

1. Magali Soumillon, D.C., Stefan Semrau, Alexander van Oudenaarden, Tarjei S. Mikkelsen. Characterization of directed differentiation by high-throughput single-cell rna-seq. *bioRxiv* **2014**.
2. Love, M.I.; Huber, W.; Anders, S. Moderated estimation of fold change and dispersion for rna-seq data with deseq2. *Genome Biol* **2014**, *15*, 550.
3. Benjamini, Y.; Hochberg, Y. Controlling the false discovery rate: A practical and powerful approach to multiple testing. *J. R. Statist. Soc.* **1995**, *57*, 289-300.
4. Subramanian, A.; Tamayo, P.; Mootha, V.K.; Mukherjee, S.; Ebert, B.L.; Gillette, M.A.; Paulovich, A.; Pomeroy, S.L.; Golub, T.R.; Lander, E.S., *et al.* Gene set enrichment analysis: A knowledge-based approach for interpreting genome-wide expression profiles. *Proc Natl Acad Sci U S A* **2005**, *102*, 15545-15550.
